# Supplementary material for: Amelioration of Cyclosporine A-Induced Acute Nephrotoxicity by Cordyceps cicadae Mycelia via Mg+2 Reabsorption and the Inhibition of GRP78-IRE1-CHOP Pathway: In Vivo and In Vitro
Source: MDPI journal article supplement (doi:10.3390/ijms24010772), 2023-01-01
Supplement: s1 [file s1]

## *Supplementary material*

# ***Cordyceps cicadae* mycelium against cyclosporine-induced acute nephrotoxicity via the regulation of renal TRPM 6 and 7 channel activity in rats**

Zong-Han Wu<sup>1</sup>, Chun-Hung Chiu<sup>1,2</sup>, Chin-Chu Chen<sup>3</sup>, Charng-Cherng Chyau<sup>1,\*</sup>, Chi-Hung Cheng<sup>1,4,\*</sup>

<sup>1</sup> Research Institute of Biotechnology, Hungkuang University, Taichung 43302, Taiwan

<sup>2</sup> Department of Program in Animal Healthcare, Hungkuang University, Shalu District, Taichung City 43302, Taiwan; [chchiu@hk.edu.tw](mailto:chchiu@hk.edu.tw)

<sup>3</sup> Grape King Biotechnology Center, Chung-Li City, Taoyuan County 320, Taiwan

<sup>4</sup> Department of Nephrology, Catholic Mercy Hospital, Hukou Township, Hsinchu County, Taiwan; [chc.ede@msa.hinet.net](mailto:chc.ede@msa.hinet.net)

\* Correspondence: [ccchyau@hk.edu.tw](mailto:ccchyau@hk.edu.tw) (C.-C.C.); [chc.ede@msa.hinet.net](mailto:chc.ede@msa.hinet.net) (C.-H.C.); Tel: +886-26318652; Fax: +886-4-26525386

**Table S1.** The sequence of primers used in this study.

| Name                                     | Sequence(5' to 3')             |
|------------------------------------------|--------------------------------|
| <i>IL-1<math>\beta</math></i> -forward   | <i>ccagggacaggatatggagca</i>   |
| <i>IL-1<math>\beta</math></i> - reverse  | <i>ttcaacacgcaggacaggtacag</i> |
| <i>IRE1<math>\alpha</math></i> - forward | <i>gatcctcagaaacgccctc</i>     |
| <i>IRE1<math>\alpha</math></i> - reverse | <i>tctgtcgctcacgtcctg</i>      |
| <i>PERK</i> - forward                    | <i>aggacagaggggacagagttg</i>   |
| <i>PERK</i> - reverse                    | <i>taatgaccttttcttcctgctcc</i> |
| <i>ATF6</i> - forward                    | <i>agtattttgtccgctgccg</i>     |
| <i>ATF6</i> - reverse                    | <i>gcagaatcccaatcttcatcca</i>  |
| <i>CHOP(GADD153)</i> - forward           | <i>cagagctggaacctgaggag</i>    |
| <i>CHOP(GADD153)</i> - reverse           | <i>tggatcagtctggaaaagca</i>    |
